# Supplementary material for: One-Pot Synthesis of Ultra-Small Pt Nanoparticles-Loaded Nitrogen-Doped Mesoporous Carbon Nanotube for Efficient Catalytic Reaction
Source: MDPI journal article supplement (doi:10.3390/nano13192633), 2023-09-25
Supplement: s1 [file s1]

## Supporting Information

# One-Pot Synthesis of Ultra-Small Pt Nanoparticles-Loaded Nitrogen-Doped Mesoporous Carbon Nanotube for Efficient Catalytic Reaction

Qian Zhang <sup>1</sup>, Minying Wu <sup>1</sup>, Yuanyuan Fang <sup>1</sup>, Chao Deng <sup>2</sup>, Hsin-Hui Shen <sup>3</sup>, Yi Tang <sup>1,\*</sup> and Yajun Wang <sup>2,\*</sup>

<sup>1</sup> Department of Chemistry, Shanghai Key Laboratory of Molecular Catalysis and Innovative Materials, and Laboratory of Advanced Materials, Fudan University, Shanghai 200438, China;

13110220006@fudan.edu.cn (Q.Z.); 18110220035@fudan.edu.cn (M.W.); 19110220078@fudan.edu.cn (Y.F.)

<sup>2</sup> College of Chemistry & Materials Engineering, Wenzhou University, Wenzhou 325027, China; dengchao@wzu.edu.cn

<sup>3</sup> Department of Materials Science and Engineering, Monash University, Clayton, VIC 3800, Australia; hsin-hui.shen@monash.edu

\* Correspondence: authors: yitang@fudan.edu.cn (Y.T.); yajunwang@wzu.edu.cn (Y.W.)

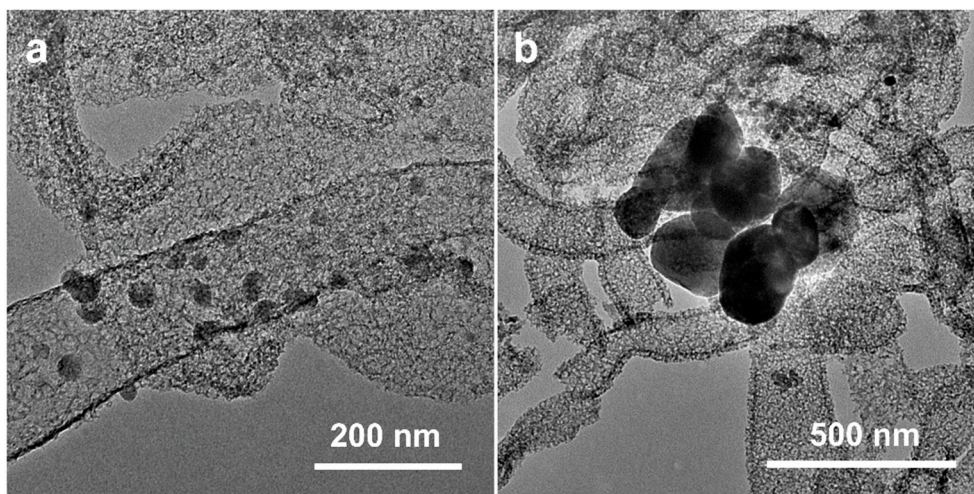

**Figure S1.** TEM images of the Pt loaded NMCT synthesized by rotary evaporation and calcination.

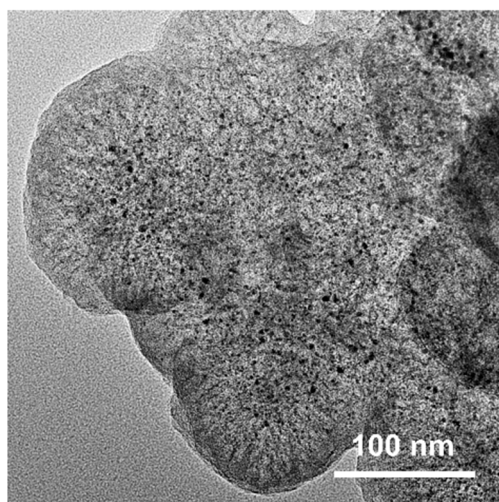

**Figure S2.** TEM image of Pt/NMCS.
